# Supplementary material for: Aurka orchestrates colorectal cancer progression through dual regulation of tumor proliferation and immune microenvironment
Source: Research Square preprint supplement (doi:10.21203/rs.3.rs-7001456/v1), 2025-07-28
Supplement: Supplementary file 1 [file 34330de49e89c76498e4413f.xlsx]

## Sheet: Sheet1
Supplementary Table1. Clinical characteristics of CRC patients
样本号	阳性组别	抗体								样本号
		aurka表达占比		ki-67表达占比		CD4表达占比
		癌	癌旁	癌间质淋巴细胞	癌旁间质淋巴细胞	癌间质淋巴细胞	癌旁间质淋巴细胞				年龄	性别	临床分期	T	N	M	部位	微卫星不稳定状态MSS/MSI-H	组织学类型 腺癌/粘液腺癌
ZSC	3+	0.03	0	0.1	0.05	0.4	0.25		赵甩成	ZSC	58	女	3T3N1M0	3	0	0	乙状结肠	MSS	中分化腺癌		LAJ	刘爱君	．女．69岁．2期结肠肝曲癌（右半结肠）.
	2+	0.15	0.05	0.15	0.1	0.25	0.1														WRX	王仁小	4，男、68岁， 2期，直肠癌 T3N0M0。
	1+	0.4	0.2	0.05	0.05	0.05	0.05														ZZY	朱震影	5．思．68岁，4期，有转移．乙状结肠癌 .T4N1M1
	0+	0.42	0.75	0.7	0.8	0.3	0.5														ZCF	周财福	6．男、71岁， 2 期，左半结肠．T3N0M0
ZZY	3+	0.02	0	0.05	0.05	0.1	0.15		朱震影	ZZY	68	男	4 T4N1M1	4	1	1	乙状结肠	MSS	中分化腺癌		STF	孙天福	7，男，72岁2期．直肠癌， . T3N0M0
	2+	0.05	0.02	0.1	0.05	0.55	0.3														LJM	李江明	9，男，2期，70岁，乙状结肠癌，
	1+	0.6	0.15	0.05	0.05	0.15	0.1														ZLG	周连根	10：男、76岁，2 期降洁肠 Ca .T3N0M0。
	0+	0.23	0.83	0.8	0.85	0.2	0.45														ZSC	赵甩成	11、女、58岁，乙状结肠 Ca 2 期．
ZCF	3+	0	0	0.1	0	0.15	0.05		周财福	ZCF	71	男	2 T3N0M0	3	0	0	左半结肠	MSS	中分化腺癌		DHP	戴和平	62 男 直肠上段癌 2期
	2+	0.05	0.02	0.05	0.05	0.3	0.2														ZSL	周绍良	68 男 降结肠癌 左半结肠
	1+	0.35	0.1	0	0.05	0.2	0.15														CHX	陈惠先	65 男 乙状结肠癌 肝转移 新辅助化疗
	0+	0.6	0.88	0.85	0.9	0.35	0.6														XAL	肖阿莲	76 女 升结肠癌 右半结肠
STF	3+	0.02	0	0	0.05	0.55	0.2		孙天福	STF	72	男	2 T3N0M0	3	0	0	直肠癌	MSS	中分化腺癌
	2+	0.45	0.2	0.15	0.05	0.1	0.15
	1+	0.2	0.15	0.05	0	0	0.1
	0+	0.33	0.65	0.8	0.9	0.35	0.65
WRX	3+	0	0	0.1	0	0.05	0.03		王仁小	WRX	68	男	2 T3N0M0	3	0	0	直肠癌	MSS	中分化腺癌
	2+	0.55	0.05	0.1	0.05	0.65	0.25
	1+	0.15	0.2	0.05	0.1	0	0.05
	0+	0.3	0.75	0.75	0.85	0.3	0.68
LAJ	3+	0	0	0.03	0.02	0.6	0.15		刘爱君	LAJ	69	女	2T3N0M0	3	0	0	右半结肠；结肠肝曲	MSS	中分化腺癌
	2+	0.05	0	0.1	0.05	0.1	0.35
	1+	0.8	0.05	0.02	0.03	0.05	0.05
	0+	0.15	0.95	0.8	0.9	0.25	0.35
LJM	3+	0	0	0.1	0.05	0.15	0.1		李江明	LJM	70	男	3T3N1M0	3	1	0	乙状结肠	MSS	中分化腺癌
	2+	0.15	0.15	0.05	0.05	0.45	0.3
	1+	0.1	0.05	0	0	0.05	0.15
	0+	0.75	0.8	0.85	0.9	0.3	0.45
ZLG	3+	0.02	0	0.1	0.05	0.1	0.05		周连根	ZLG	76	男	2T3N0M0	3	0	0	降结肠	MSS	中分化腺癌
	2+	0.05	0	0.05	0.05	0.6	0.35
	1+	0.55	0.05	0.05	0	0.05	0.1
	0+	0.38	0.95	0.8	0.9	0.25	0.55
DHP	3+	0.05	0	0.1	0.05	0.45	0.25		戴和平	DHP	62	男	2T3N0M0	3	0	0	直肠上段	MSS	中分化腺癌
	2+	0.7	0.15	0.15	0.05	0.25	0.2
	1+	0.05	0.15	0.05	0	0.1	0.15
	0+	0.2	0.7	0.7	0.9	0.2	0.4
ZSL	3+	0	0	0.05	0.05	0.15	0.1		周绍良	ZSL	68	男	3T3N1M0	3	1	0	左半结肠	MSS	中分化腺癌
	2+	0.5	0.1	0.1	0	0.5	0.35
	1+	0.15	0.1	0	0.05	0.15	0.25
	0+	0.35	0.8	0.85	0.9	0.2	0.3
CHX	3+	0.02	0	0.05	0.05	0.35	0.2		陈惠先	CHX	65	男	4T4N1M0	3	1	1	乙状结肠	MSS	中分化腺癌	肝转移
	2+	0.35	0.05	0.1	0.05	0.3	0.35
	1+	0.15	0.05	0.03	0	0.15	0.1
	0+	0.58	0.9	0.82	0.9	0.2	0.35
XAL	3+	0.03	0	0.05	0.05	0.4	0.2		肖阿莲	XAL	76	女	3T3N1M0	3	1	0	右半结肠	MSS	低分化腺癌
	2+	0.02	0	0.1	0.03	0.15	0.35
	1+	0.4	0.15	0.03	0.02	0.1	0.1
	0+	0.55	0.85	0.82	0.9	0.35	0.35

## Sheet: Sheet3
Supplementary Table1. Clinical characteristics of CRC patients
Sample ID	Age	Gender	TNM Stage	T	N	M	Position	MSS/MSI-H	histologic subtypes
ZSC	58	female	T3N1M0	3	0	0	Sigmoid colon	MSS	Moderately differentiated adenocarcinoma
ZZY	68	male	T4N1M1	4	1	1	Sigmoid colon	MSS	Moderately differentiated adenocarcinoma
ZCF	71	male	T3N0M0	3	0	0	Left colon	MSS	Moderately differentiated adenocarcinoma
STF	72	male	T3N0M0	3	0	0	Sigmoid colon	MSS	Moderately differentiated adenocarcinoma
WRX	68	male	T3N0M0	3	0	0	Sigmoid colon	MSS	Moderately differentiated adenocarcinoma
LAJ	69	female	T3N0M0	3	0	0	Left colon	MSS	Moderately differentiated adenocarcinoma
LJM	70	male	T3N1M0	3	1	0	Sigmoid colon	MSS	Moderately differentiated adenocarcinoma
ZLG	76	male	T3N0M0	3	0	0	Descending colon	MSS	Moderately differentiated adenocarcinoma
DHP	62	male	T3N0M0	3	0	0	Sigmoid colon	MSS	Moderately differentiated adenocarcinoma
ZSL	68	male	T3N1M0	3	1	0	Left colon	MSS	Moderately differentiated adenocarcinoma
CHX	65	male	T4N1M0	3	1	1	Sigmoid colon	MSS	Moderately differentiated adenocarcinoma
XAL	76	female	T3N1M0	3	1	0	Left colon	MSS	Poorly differentiated adenocarcinoma
