# Supplementary material for: Aurka orchestrates colorectal cancer progression through dual regulation of tumor proliferation and immune microenvironment
Source: Research Square preprint supplement (doi:10.21203/rs.3.rs-7001456/v1), 2025-07-28
Supplement: Supplementary file 2 [file b6f90b1c38eefa5b29347f3e.xlsx]

## Sheet: Indiviual IHC score
Supplementary Table2. IHC score for AURKA, Ki-67, and CD4
Sample ID	Group	AURKA Expression		Ki-67 Expression		CD4 Expression
		Tumor	Adjacent	Tumor	Adjacent	Tumor	Adjacent
ZSC	3+	0.0670391	0	0.242424	0.142857	0.581818	0.526316
	2+	0.251397	0.115385	0.272727	0.214286	0.272727	0.157895
	1+	0.446927	0.307692	0.0606061	0.0714286	0.0363636	0.0526316
	0+	0.234637	0.576923	0.424242	0.571429	0.109091	0.263158
ZZY	3+	0.0481928	0	0.142857	0.153846	0.156863	0.27907
	2+	0.0903614	0.0504202	0.214286	0.115385	0.647059	0.418605
	1+	0.722892	0.252101	0.0714286	0.0769231	0.117647	0.0930233
	0+	0.138554	0.697479	0.571429	0.653846	0.0784314	0.209302
ZCF	3+	0	0	0.285714	0	0.266667	0.117647
	2+	0.103448	0.0526316	0.107143	0.130435	0.4	0.352941
	1+	0.482759	0.175439	0	0.0869565	0.177778	0.176471
	0+	0.413793	0.77193	0.607143	0.782609	0.155556	0.352941
STF	3+	0.037037	0	0	0.16	0.77193	0.380952
	2+	0.625	0.387097	0.333333	0.12	0.105263	0.214286
	1+	0.185185	0.193548	0.0740741	0	0	0.0952381
	0+	0.152778	0.419355	0.592593	0.72	0.122807	0.309524
WRX	3+	0	0	0.258065	0	0.0816327	0.0727273
	2+	0.733333	0.115385	0.193548	0.125	0.795918	0.454545
	1+	0.133333	0.307692	0.0645161	0.166667	0	0.0606061
	0+	0.133333	0.576923	0.483871	0.708333	0.122449	0.412121
LAJ	3+	0	0	0.0952381	0.0672269	0.786885	0.285714
	2+	0.0789474	0	0.238095	0.12605	0.0983607	0.5
	1+	0.842105	0.0952381	0.031746	0.0504202	0.0327869	0.047619
	0+	0.0789474	0.904762	0.634921	0.756303	0.0819672	0.166667
LJM	3+	0	0	0.285714	0.16	0.255319	0.195122
	2+	0.321429	0.333333	0.107143	0.12	0.574468	0.439024
	1+	0.142857	0.0740741	0	0	0.0425532	0.146341
	0+	0.535714	0.592593	0.607143	0.72	0.12766	0.219512
ZLG	3+	0.0467836	0	0.275862	0.16	0.156863	0.1
	2+	0.0877193	0	0.103448	0.12	0.705882	0.525
	1+	0.643275	0.0952381	0.0689655	0	0.0392157	0.1
	0+	0.222222	0.904762	0.551724	0.72	0.0980392	0.275
DHP	3+	0.0769231	0	0.242424	0.16	0.610169	0.434783
	2+	0.807692	0.310345	0.272727	0.12	0.254237	0.26087
	1+	0.0384615	0.206897	0.0606061	0	0.0677966	0.130435
	0+	0.0769231	0.482759	0.424242	0.72	0.0677966	0.173913
ZSL	3+	0	0	0.148148	0.166667	0.230769	0.177778
	2+	0.697674	0.230769	0.222222	0	0.576923	0.466667
	1+	0.139535	0.153846	0	0.0833333	0.115385	0.222222
	0+	0.162791	0.615385	0.62963	0.75	0.0769231	0.133333
CHX	3+	0.039801	0	0.144928	0.16	0.5	0.333333
	2+	0.522388	0.130435	0.217391	0.12	0.321429	0.4375
	1+	0.149254	0.0869565	0.0434783	0	0.107143	0.0833333
	0+	0.288557	0.782609	0.594203	0.72	0.0714286	0.145833
XAL	3+	0.0784314	0	0.144928	0.162602	0.615385	0.333333
	2+	0.0392157	0	0.217391	0.0731707	0.173077	0.4375
	1+	0.522876	0.26087	0.0434783	0.0325203	0.0769231	0.0833333
	0+	0.359477	0.73913	0.594203	0.731707	0.134615	0.145833
